# Supplementary material for: Non-organic solvent extraction of capsaicinoids from oil combined with fluorescent lateral flow immunoassay strips for on-site identification of illegally recycled waste cooking oil
Source: Royal Society of Chemistry journal article supplement (doi:10.1039/d4sd00306c), 2024-12-20
Supplement: d4sd00306c1.xlsx [file d4sd00306c1.xlsx]

## Sheet: optimization of LFIA 
200nm VS 70nm	C			T					T/C	抑制率		T/C			标准差/平均值	抑制率
	C值	均值	标准差	T值	均值		标准差					个值	均值	标准差					T线荧光空白值	抑制率	I SD	F标准品标准差
																	I SD	70nm	4068.33	0.57	0.0144237	83.75
70nm 空白	1396	1426.67	79.7552	3968	4068.33		83.747		2.85164		0.558168	2.84241	2.85801	0.122174	4.27478		0.0144237	200nm	11791.7	0.83	0.0195799	846.67
	1348			4064							0.586968	3.01484					0.0195799
	1536			4173							0.571128	2.7168
70nm 5ppb	2782	2692.67	63.9236	3513	3294.67		158.792		1.22357	0.570923		1.26276	1.22298	0.0336586	2.75219	#REF!	CV
	2660			3140								1.18045					0.0252639
	2636			3231								1.22572					0.0236864
200nm 空白	5328	5509.33	211.498	11973	11791.7		846.674		2.14031		0.842604	2.24718	2.13943	0.115503	5.39879
	5806			12726							0.804288	2.19187
	5394			10676							0.83045	1.97924
200nm 5ppb	12826	12042	612.858	4319	4468.33		195.152		0.371062	0.826631		0.336738	0.37273	0.0342029	9.17633	#REF!
	11330			4744								0.418711
	11970			4342								0.36274
200nm AB 优化	C			T					T/C	抑制率
	C值	均值	标准差	T值	均值		标准差
																							方差分析：单因素方差分析
1.9ug/ml 空白	7861	7488.33	281.141	4848	4607		273.821		0.615224																							方差分析：单因素方差分析															方差分析：单因素方差分析
	7182			4224												I SD							SUMMARY
	7422			4749								ug/ml	I%	F		0.0374	空白标准差						组	观测数	求和	平均	方差					SUMMARY															SUMMARY
1.9ug/ml 5ppb	10726	10629.7	206.305	1500	1767.33		195.075		0.166264	0.72975		1.90	0.73	4240.33		0.00824	273.82						列 1	3	2.1234	0.7078	6.763e-05					组	观测数	求和	平均	方差											组	观测数	求和
	10343			1842								3.81	0.71	6722		0.0229	197.04						列 2	0	0	#DIV/0!	#DIV/0!					列 1	3	2.18834	0.729447	0.00140089				方差分析：单因素方差分析							列 1	3	13821
	10820			1960								7.62	0.69	9866.33		0.0326	252.54						列 3	3	2.065	0.688333	0.000518093					列 2	3	2.065	0.688333	0.000518093											列 2	3	20166
3.81ug/ml空白	5835	5606.67	186.98	6951	6722		197.04		1.19893			11.43	0.61	10654.5		0.02323	339.5																							SUMMARY
	5377			6470								21.59	0.55	10968.3			410.77																							组	观测数	求和	平均	方差
	5608			6745																			方差分析		3.81&7.62							方差分析			1.9&7.62					列 1	3	31730	10576.7	133434			方差分析
3.81ug/ml 5ppb	8240	8295.33	52.0278	2955	2905.67		48.9172		0.350277	0.707842													差异源	SS	df	MS	F	P-value	F crit			差异源	SS	df	MS	F	P-value	F crit		列 2	3	32905	10968.3	253097			差异源	SS	df
	8281			2923																			组间	0.000568427	2	0.000284213	0.727852	0.552468	9.55209			组间	0.00253546	1	0.00253546	2.6425	0.179366	7.70865									组间	6.70984e+06	1
	8365			2839																			组内	0.00117145	3	0.000390482						组内	0.00383797	4	0.000959492												组内	341408	4
7.62ug/ml 空白	3541	3771.67	205.45	9519	9866.33		252.54		2.61591			1.9	3.81		7.62	11.43																								方差分析			11.43&21.59
	4040			10112								0.77257	0.7169	0.77257	0.712	0.6							总计	0.00173987	5							总计	0.00637343	5						差异源	SS	df	MS	F	P-value	F crit	总计	7.05125e+06	5
	3734			9968								0.71037	0.7056	0.71037	0.6864	0.6																								组间	230104	1	230104	1.19061	0.336528	7.70865
7.62ug/ml 5ppb	8649	7967.67	503.456	6518	6486		286.668		0.81404	0.688812		0.7054	0.7009	0.7054	0.6666	0.54	方差分析：单因素方差分析																							组内	773063	4	193266
	7448			6120
	7806			6820										11.43	21.59		SUMMARY																							总计	1.00317e+06	5					方差分析：单因素方差分析
11.43ug/ml 空白	4912	3812	669.674	10421	10654.5		339.5		2.79499					0.6	0.58		组	观测数	求和	平均	方差
	3293			10315										0.6	0.56		列 1	3	2.18834	0.729447	0.00140089																										SUMMARY
	4331			10994										0.54	0.53		列 2	3	2.1234	0.7078	6.763e-05															方差分析：单因素方差分析											组	观测数	求和
11.43ug/ml5ppb	7170	7093.67	256.809	7437	7666.33		223.293		1.08073	0.613333																																					列 1	3	20166
	7363			7593																																SUMMARY											列 2	3	29599
	6748			7969													方差分析			1.97&3.81																组	观测数	求和	平均	方差
21.59ug/ml空白	2669	3050.67	574.034	11163	10968.3		410.769		3.59539								差异源	SS	df	MS	F	P-value	F crit													列 1	3	2.065	0.688333	0.000518093
	3862			10397													组间	0.000702867	1	0.000702867	0.957245	0.38328	7.70865													列 2	3	1.74	0.58	0.0012							方差分析
	2621			11345									F	I%	空白标准差		组内	0.00293704	4	0.000734261																											差异源	SS	df
21.59ug/ml5ppb	5621	5408.33	227.452	8683	8793.33		112.049		1.62589	0.547786		0.2	6559.33	0.45	240.44																																组间	1.48302e+07	1
	5511			8947								0.4	10564.3	0.51	246.72		总计	0.00363991	5																	方差分析			7.62&11.43								组内	307803	4
	5093			8750								0.6	10582	0.5	375.86																					差异源	SS	df	MS	F	P-value	F crit
												0.8	11939	0.44	292.25																					组间	0.0176042	1	0.0176042	20.4927	0.0106025	7.70865					总计	1.51381e+07	5
												1	4598	0.43	241.39																					组内	0.00343619	4	0.000859047
200nm Ag 优化	C			T					T/C	抑制率		T/C			标准差/平均值	抑制率
	C值	均值	标准差	T值	均值		标准差					个值	均值	标准差						FI	I%	F空白标准差
																			0.2	6559.33	0.71	240.44
0.2 空白	5485	5166	247.415	6241	6559.33		240.436		1.26971		0.696109	1.13783	1.27412	0.0969312	7.60767		I SD		0.4	10564.3	0.81	246.72
	4882			6615							0.732954	1.35498					0.0184306		0.6	10582	0.8	375.86																									方差分析：单因素方差分析
	5131			6822							0.71358	1.32957					0.00983496		0.8	11939	0.7	292.25
0.2 5ppb	5935	6112.67	128.401	2298	2224		88.8857		0.363835	0.713451		0.387195	0.364126	0.0191737	5.26568	#REF!	0.0257812		1	4598	0.69	241.39																									SUMMARY
	6169			2099								0.34025					0.00566384																														组	观测数	求和
	6234			2275								0.364934					0.0152646																														列 1	3	29599
0.4 空白	3156	3464.33	362.374	10850	10564.3		246.72		3.04946		0.800746	3.4379	3.08145	0.317502	10.3037		#DIV/0!																														列 2	3	31730
	3973			10595							0.816623	2.66675
	3264			10248							0.81874	3.13971					CV
0.4 5ppb	6132	6413.33	245.408	3765	3709.33		74.5222		0.578378	0.810334		0.613992	0.579201	0.0247447	4.27221	#REF!	0.0258331																														方差分析
	6378			3604								0.565067					0.0121369		0.4	0.6	0.8	1																									差异源	SS	df
	6730			3759								0.558544					0.0322995		0.8007	0.81749	0.69438	0.671																									组间	756860	1
0.6 空白	3743	4013	435.213	10076	10582		375.862		2.63693		0.817491	2.69196	2.66491	0.278403	10.447		0.00814699		0.81662	0.8118	0.70183	0.7099																									组内	458197	4
	4627			10694							0.811834	2.31122					0.0221229		0.81874	0.7702	0.6907	0.6883
	3669			10976							0.770278	2.99155					#DIV/0!																														总计	1.21506e+06	5
0.6 5ppb	6493	6432.33	142.944	3158	3423		284.079		0.532155	0.798191		0.48637	0.533335	0.056097	10.5181	#REF!			10850	10076
	6569			3294								0.501446							10595	10694
	6235			3817								0.612189							10248	10976
0.8 空白	4756	4461	253.536	12211	11939.7		292.251		2.67646		0.694385	2.56749	2.68153	0.0901841	3.36316
	4490			12074							0.701832	2.68909
	4137			11534							0.690717	2.78801
0.8 5ppb	5790	5581.67	248.103	4745	4553.33		166.049		0.815766	0.695207		0.819516	0.816138	0.0124007	1.51944	#REF!				I%	FI
	5722			4575								0.799546								0.71	6559.33
	5233			4340								0.829352								0.81	10564.3
1 空白	4913	5019.5	69.8618	5197	4598		341.395		0.916027		0.671012	1.05781	0.916711	0.0814998	8.89045					0.8	10582
	4960			4833							0.709986	0.974395								0.7	11939
	5079			4363							0.688398	0.859027								0.69	4598
1 5ppb	6174	6436	187.842	1862	1827.67		50.6908		0.283976	0.689992		0.301587	0.284365	0.0146141	5.13922	#REF!
	6605			1756								0.265859
	6529			1865								0.285649
200nm pH 优化	C			T					T/C	抑制率
	C值	均值	标准差	T值	均值		标准差
6.08 空白	2110	2319.67	158.169	23959	23982.3	11.355	498.336		10.3387
	2492			24604		9.87319
	2357			23384		9.92109					pH	I	F	F标准差			第二次	I 标准差	CV
6.08 5ppb	3374	3884	510	13060	13060	3.87078	46.5	0.625603	3.36251	0.674764	6.08	0.67	23982.3	498.34			0.67	0.0821922	0.122675
	4394			13153		2.9934		0.710466			6.54	0.69	20219	1107			0.69	0.00471405	0.00683195
	7369			13165		1.78654		0.827199			7.01	0.76	14700	410			0.76	0.0169967	0.0223641
6.54 空白	2469	2882.5	378.404	19581	20219	7.93074	1107.81		7.0144		7.55	0.91	13016.3	382			0.91	0.0216025	0.023739
	3296			20857		6.32797					8.12	0.84	12135.3	269			0.84	0.0124722	0.0148478
	3245			18145		5.59168
6.54 5ppb	3858	3813	33.6749	8275	8162.33	2.14489	225.217	0.694216	2.14066	0.694819
	3804			8364		2.19874		0.686539
	3777			7848		2.07784		0.703775							6	6.5	7	7.5	8
7.01 空白	3424	3787	312.59	14183	14700.3	4.14223	410.085		3.88179						0.63	0.69	0.77	0.93	0.84
	3750			14732		3.92853									0.71	0.69	0.78	0.92	0.85
	4187			15186		3.62694									0.83	0.7	0.74	0.88	0.82
7.01 5ppb	5728	5381.67	377.282	5014	4918.67	0.875349	72.5963	0.774498	0.913967	0.76455
	5560			4838		0.870144		0.775839
	4857			4904		1.00968		0.739894
7.55空白	4318	3907	571.371	13525	13016.3	3.13224	382.672		3.33154
	4304			12922		3.00232
	3099			12602		4.06647
7.55 5ppb	7103	6539.67	1139.85	1773	1947	0.249613	149.96	0.925076	0.297722	0.910635
	7566			2139		0.282712		0.915141
	4950			1929		0.389697		0.883028
8.12 空白	4140	4627	980.604	12290	12135.3	2.9686	269.001		2.62272
	5995			11757		1.96113
	3746			12359		3.29925
8.12 5ppb	6474	6306.33	773.786	2672	2659	0.412728	120.784	0.842634	0.42164	0.839236
	7159			2800		0.391116		0.850874
	5286			2505		0.473893		0.819312
检测时间优化min
	C			T		T/C
1	2801	3223	353.447	5323	6116	1.90039
	3666			6892		1.87998
	3202			6133		1.91537
4	5449	5959.67	365.982	9353	10193.3	1.71646
	6142			10814		1.76066
	6288			10413		1.65601	SD	均值FI	均值T/C	SD
6	12155	13191.3	817.749	18356	19834.7	1.51016	640.654	6116	1.89761	0.0145036
	13265			19567		1.47508	616.344	10193.3	1.71039	0.0428956
	14154			21581		1.52473	1330.14	19834.7	1.50361	0.0208352
8	16365	16191.3	151.9	23620	23213.3	1.44332	628.892	23213.3	1.43369	0.0276864
	15995			22325		1.39575	936.308	25620.3	1.38023	0.00851589
	16214			23695		1.46139	113.014	26704.3	1.36971	0.00714103
10	19377	18562.3	576.114	26941	25620.3	1.39036	523.083	27048.7	1.35818	0.0123985
	18165			24877		1.3695	509.327	28074.3	1.36806	0.0162351
	18145			25043		1.38016
12	19269	19496.3	161.279	26576	26704.3	1.37921	1
	19594			26686		1.36195	4
	19626			26851		1.36813	6
15	19244	19915.3	567.107	26416	27048.7	1.37269	8
	20631			27697		1.34249	10
	19871			27033		1.36042	12
20	19908	20521.3	433.97	27494	28074.3	1.38105	15
	20809			27995		1.34533	20
	20847			28734		1.37833
			23620	26941	26576	26416
			22325	24877	26686	27697
			23695	25043	26851	27033
																					方差分析：单因素方差分析
			方差分析：单因素方差分析									方差分析：单因素方差分析
																					SUMMARY
			SUMMARY									SUMMARY									组	观测数	求和	平均	方差
			组	观测数	求和	平均	方差					组	观测数	求和	平均	方差					列 1	3	80113	26704.3	19158.3
			列 1	3	69640	23213.3	593258					列 1	3	76861	25620.3	1.31501e+06					列 2	3	81146	27048.7	410424
			列 2	3	76861	25620.3	1.31501e+06					列 2	3	80113	26704.3	19158.3
																					方差分析			12min&15min
			方差分析		8min&10min							方差分析			10min&12min						差异源	SS	df	MS	F	P-value	F crit
			差异源	SS	df	MS	F	P-value	F crit			差异源	SS	df	MS	F	P-value	F crit			组间	177848	1	177848	0.828004	0.414322	7.70865
			组间	8.69047e+06	1	8.69047e+06	9.10823	0.0392409	7.70865			组间	1762584	1	1762584	2.64222	0.179384	7.70865			组内	859165	4	214791
			组内	3.81654e+06	4	954134						组内	2.66834e+06	4	667084
																					总计	1.03701e+06	5
			总计	1.2507e+07	5							总计	4.43092e+06	5
[truncated: 9 more columns]

## Sheet: optimization of CDs
二甲基CD标曲	C值	均值	标准差	T值	均值		标准差		T/C	抑制率	CAP	C			T
空白		30145	2380.37		69190.7	#DIV/0!	2517.13		2.29526			36305	30083	4446.06	79269	71534	2.18342	7881.13		2.37789
						#DIV/0!						27757			74616		2.68819
						#DIV/0!						26187			60717		2.31859
						#DIV/0!					10ppb=11.11μg/kg	30249	32405.7	1525.89	43061	45996	1.42355	2199.04	0.401338	1.41938	0.403048
						#DIV/0!						33548			48354		1.44134		0.393858
						#DIV/0!						33420			46573		1.39357		0.413948
						#DIV/0!						代标曲计算得出的值		萃取率						萃取率	0.231
						#DIV/0!						1.14157	2.28314	0.228314			SD	CV
						#DIV/0!						1.09691	2.19382	0.219382			0.0133877	0.0579556
	31048			70258		2.26288						1.22854	2.45708	0.245708
	26885			65716		2.44434
	32502			71598		2.20288
0.05	28864	31482.7	2158.69	74828	71191	2.59243	2783.1	-0.129472	2.26128	0.0539978
	34151			73876		2.16322		0.0575296						CD优化所有标曲加标浓度单位均为ng/ml							Capsaicin transfer efficiency（%）
	31433			68506		2.17943		0.0504659			SD	CV											SD
0.1	37969	36173	3211.11	75689	71419	1.99344	5014.31	0.131497	1.97437	0.119261	0.00353183	0.065407									PBST	0.05728	0.005878
	34377			67149		1.95331		0.148981			0.00874197	0.0733009									S-β-CD	0.1598	0.014001
	30113			63774		2.11782		0.0773066			0.0154162	0.061609									DM-β-CD	0.231	0.013387
0.4	25609	32646	5002.89	49345	57924.3	1.92686	6068.41	0.160505	1.77432	0.250226	0.00782955	0.0180519									M-β-CD	0.2112	0.01509
	35529			62400		1.75631		0.23481			0.00863832	0.0143246									HP-β-CD	0.1052	0.013637
	36800			62028		1.68554		0.265642			0.0146207	0.0200824									E-β-CD	0.1206	0.00596
1.6	28464	28850.5	1220.26	36327	37458	1.27624	1848.55	0.443966	1.29835	0.433723	0.012165	0.0138653
	29237			38589		1.31987		0.424959			0.000444473	0.000445384							I%	SD
	31351			40855		1.30315		0.432244										PBST	0.10056	0.00491265
3.1	31980	31980	2203.24	28427	27909	0.888899	2221.07	0.612724	0.872702	0.603042								S-β-CD	0.29489	0.00967711
	27514			24967		0.907429		0.604651										DM-β-CD	0.40305	0.00829023
	32371			30333		0.937042		0.591749										M-β-CD	0.42335	0.00983738
6.2	32206	33127	1069.81	18603	20705.7	0.577625	1670.98	0.74834	0.625039	0.728036								HP-β-CD	0.26838	0.0118683
	34627			22691		0.655298		0.7145										E-β-CD	0.28112	0.00518977
	32548			20823		0.639763		0.721268
25	31675	32285	972.139	8808	9566.33	0.278074	1154.72	0.878849	0.296309	0.877365
	32895			11198		0.340416		0.851687
	30514			8693		0.284886		0.875881
100	29901	29142.7	548.017	163	137	0.00545132	30.6268	0.997625	0.00470101	0.997955
	28902			94		0.00325237		0.998583
	28625			154		0.00537991		0.997656
甲基CD标曲	C值	均值	标准差	T值	均值		标准差		T/C	抑制率	CAP	C			T
空白		33204	1679.93		74237.7	#DIV/0!	3498.71		2.2358			39481	37105.7	3390.39	86023	81021	2.17885	5824.73		2.18352
						#DIV/0!						39525			84188		2.12999
						#DIV/0!						32311			72852		2.25471
						#DIV/0!					10ppb	31084	31806.3	711.415	39419	40055	1.26814	1357.73	0.41922	1.25934	0.423352
						#DIV/0!						32774			41942		1.27973		0.413913
						#DIV/0!						31561			38804		1.22949		0.436922
						#DIV/0!															0.2112
						#DIV/0!						1.0296	2.0592	0.20592
						#DIV/0!						1.00002	2.00004	0.200004			0.0150959	0.0714768
	32542			69375		2.13186						1.14301	2.28602	0.228602
	31559			75877		2.40429
	35511			77461		2.18132
0.05	41915	39583	2328.79	90311	83353	2.15462	5742.56	0.0363102	2.10578	0.041561
	40431			89126		2.2044		0.0140474
	36403			77580		2.13114		0.0468117			SD	CV
0.1	39917	41730	1817.51	81015	86002	2.02959	4502.45	0.0922346	2.06092	0.0804228	0.00525077	0.126339
	43543			90989		2.08964		0.0653766			0.0112007	0.139273
	43967			90078		2.04876		0.0836572			0.0112438	0.0396332
0.4	40786	38508	1702.2	73442	64367.3	1.80067	6417.78	0.194623	1.67153	0.283697	0.00797786	0.0163695
	38043			59970		1.57637		0.294941			0.0197559	0.0323369
	36695			59690		1.62665		0.272453			0.0258367	0.0366104
1.6	28199	32412	6352.5	32820	36952	1.16387	7192.53	0.47944	1.14007	0.487362	0.020062	0.0223234
	36625			41084		1.12175		0.49828			0.0202735	0.0208157
	43741			50427		1.15285		0.484367
3.1	29646	29646	4331.93	24341	23463.7	0.821055	2895.58	0.63277	0.791461	0.610939
	30783			26489		0.860507		0.615124
	21078			19561		0.928029		0.584924
6.2	31927	29117.7	4133.83	21110	18953.3	0.661196	1712.78	0.704269	0.650922	0.70572
	23273			16920		0.727023		0.674827
	32153			18830		0.585637		0.738064
25	28723	28342	928.585	5243	6276.67	0.182537	1262.99	0.918358	0.221462	0.898697
	27961			8055		0.28808		0.871152
	26486			5532		0.208865		0.906582
100	30465	29392.3	2642.34	712	1597	0.0233711	1101.03	0.989547	0.0543339	0.973949
	25756			3149		0.122263		0.945316
	31956			930		0.0291025		0.986983
磺丁基CD标曲	C值	均值	标准差	T值	均值		标准差		T/C	抑制率	CAP	C			T
空白		37606.7	1465.55		83792.3	#DIV/0!	3701.63		2.22812			41361	42696	1224.13	87948	84437	2.12635	4882.81		1.97763
						#DIV/0!						44318			77532		1.74945
						#DIV/0!						42409			87831		2.07105
						#DIV/0!					10ppb	37937	37896.3	661.987	51959	52839.3	1.36961	894.947	0.307448	1.39431	0.294885
						#DIV/0!						38686			54067		1.39759		0.293304
						#DIV/0!						37066			52492		1.41618		0.283903
						#DIV/0!															0.1598
						#DIV/0!						0.8738	1.7476	0.17476
						#DIV/0!						0.78767	1.57534	0.157534			0.014001	0.087616
	38052			84631		2.22409						0.73514	1.47028	0.147028
	35631			78898		2.21431
	39137			87848		2.24463
0.05	46071	37491.3	6081.61	93002	73806.5	2.01867	9571.44	0.0940062	1.96863	0.0812793
	32681			77627		2.37529		-0.0660511
	33722			69986		2.07538		0.0685524			SD	CV		SD*100
0.1	45725	44012.5	3886.08	90994	86539	1.99003	7822.57	0.10686	1.96624	0.116045	0.0127269	0.156582		1.27269
	42300			82084		1.94052		0.129079			0.00947057	0.0816113		0.947057
	36321			71848		1.97814		0.112195			0.0180055	0.069034		1.80055
0.4	39874	41114.7	4515.53	67929	67535	1.70359	5809.53	0.235415	1.6426	0.26082	0.0102547	0.0267397		1.02547
	47160			74445		1.57856		0.291529			0.0035233	0.00712992		0.35233
	36310			60231		1.6588		0.255518			0.00909397	0.0138012		0.909397
1.6	43969	39936	3413.56	60469	55380.5	1.37526	4610.01	0.38277	1.38673	0.3835	0.00924731	0.0105889		0.924731
	35903			50292		1.40077		0.371321			0.00314199	0.00330219		0.314199
	38028			51143		1.34488		0.396408
3.1	42240	42240	573.367	47292	47775	1.1196	518.928	0.497514	1.13104	0.494157
	43156			48495		1.12371		0.495668
	41776			47538		1.13793		0.48929
6.2	40480	37928	2267.2	29627	28782	0.731892	1089.98	0.671521	0.758859	0.658928
	38333			29476		0.768946		0.654891
	34971			27243		0.779017		0.650371
25	34426	33145.5	1846.06	10719	9666.33	0.311364	921.342	0.860258	0.291633	0.873302
	31865			8475		0.265966		0.880632
	36373			9805		0.269568		0.879016
100	35817	35149.3	879.971	3891	3794.33	0.108636	177.028	0.951243	0.107949	0.951488
	35725			3546		0.0992582		0.955452
	33906			3946		0.116381		0.947767
羟乙基CD标曲	C值	均值	标准差	T值	均值		标准差		T/C	抑制率	CAP	C			T
空白		43983.3	10217.5		96103	#DIV/0!	12599.8		2.18499			38077	34842	2433.96	67631	61858.7	1.77616	4120.08		1.77541
						#DIV/0!						32206			59660		1.85245
						#DIV/0!						34243			58285		1.7021
						#DIV/0!					10ppb	28927	30149.7	2108.27	36551	38484	1.26356	2767.69	0.288298	1.27643	0.281123
						#DIV/0!						28406			36503		1.28505		0.276196
						#DIV/0!						33116			42398		1.28029		0.278876
						#DIV/0!															0.1206
						#DIV/0!						0.63612	1.27224	0.127224			SD
						#DIV/0!						0.57893	1.15786	0.115786			0.00596084	0.0494265
	48975			94219		1.92382						0.59297	1.18594	0.118594
	29744			81700		2.74677
	53231			112390		2.11136
0.05	63925	55327	8223.53	120568	102853	1.88609	14079.4	0.136798	1.859	0.0777729
	44246			88970		2.0108		0.0797183
	57810			116736		2.0193		0.0758275			SD	CV		SD*100
0.1	49251	56505	6650.21	90489	101543	1.8373	10729.3	0.159124	1.79706	0.178516	0.00194541	0.025014		0.194541
	63759			112597		1.76598		0.191767			0.0140161	0.0785145		1.40161
	50090			89236		1.78151		0.184657			0.00381764	0.0153525		0.381764
0.4	43535	55005	8340.26	69700	90519	1.60101	14988.4	0.267268	1.64565	0.248667	0.0111941	0.0272614		1.11941
	63121			104379		1.65363		0.243184			0.00840967	0.0153316		0.840967
	58359			97478		1.67032		0.235548			0.0178577	0.0252632		1.78577
1.6	50849	49595.5	4929.19	66722	64707.5	1.31216	5141.02	0.399466	1.30471	0.410619	0.0264763	0.0307162		2.64763
	48342			62693		1.29686		0.406466			0.00553611	0.0058782		0.553611
	59824			75040		1.25435		0.425925
3.1	46276	46276	3486.6	45594	49919	0.985262	3125.44	0.549076	1.07872	0.54852
	54811			52871		0.964606		0.55853
	50806			51292		1.00957		0.537953
6.2	61530	52788.7	7055.2	36171	33540.7	0.58786	2520.03	0.730955	0.635376	0.706868
	44252			30143		0.681167		0.688251
	52584			34308		0.652442		0.701398
25	52529	51749	1263.14	12989	15360	0.247273	2908.96	0.886831	0.296817	0.861965
	50969			19457		0.381742		0.825289
	49435			13634		0.275797		0.873777
100	50229	52006.3	1304.45	7171	6597.33	0.142766	461.483	0.93466	0.126856	0.941805
	53323			6041		0.113291		0.94815
	52467			6580		0.125412		0.942603
2羟丙基CD标曲	C值	均值	标准差	T值	均值		标准差		T/C	抑制率	CAP	C			T
空白		39247	5678.04		81567.7	#DIV/0!	10044.5		2.07832			32775	38534.7	4094.48	60287	71633.3	1.83942	8047.19		1.85893
						#DIV/0!						40898			76544		1.87158
						#DIV/0!						41931			78069		1.86184
						#DIV/0!					10ppb	35343	36867.3	1301.55	47250	50147.3	1.3369	2096.15	0.280825	1.36021	0.268384
						#DIV/0!						36736			51053		1.38973		0.252406
						#DIV/0!						38523			52139		1.35345		0.27192
						#DIV/0!															0.1052
						#DIV/0!						0.58531	1.17062	0.117062
						#DIV/0!						0.45184	0.90368	0.090368			0.0136379	0.129638
	38883			75962		1.9536						0.54284	1.08568	0.108568
	32482			73067		2.24946
	46376			95674		2.06301
0.05	47018	50833	2710.99	90071	80115	1.91567	5068.53	0.0782583	1.57604	0.205556
	53070			82459		1.55378		0.252386
	52411			77771		1.48387		0.286024			SD	CV		SD*100
0.1	44428	48532.5	3399.47	76478	82900.5	1.72139	5251.64	0.171737	1.70814	0.17282	0.0168189	0.0818217		1.68189
	52637			89323		1.69696		0.183492			0.00830666	0.0480654		0.830666
	47323			82298		1.73907		0.163231			0.00782118	0.034617		0.782118
0.4	48025	41868	6472.28	78041	75054.7	1.62501	2907.9	0.218113	1.79265	0.225934	0.0197375	0.0429819		1.97375
	44655			71113		1.5925		0.233756			0.022471	0.0389461		2.2471
	32924			76010		2.30865		-0.110827			0.0117435	0.0158892		1.17435
1.6	33600	39738.5	6270.56	48894	51169.5	1.45518	1874.07	0.299828	1.28766	0.459205	0.00151456	0.0016891		0.151456
	45877			53445		1.16496		0.439468			0.00371981	0.00383296		0.371981
	47732			51690		1.08292		0.478943
3.1	49892	49892	5301.65	41814	37415.3	0.83809	3112	0.596745	0.749927	0.576978
	41338			35341		0.854928		0.588644
	37153			35091		0.9445		0.545546
6.2	42802	42165.3	1900.99	24687	22875	0.576772	1600.65	0.722481	0.542507	0.739088
	44109			23144		0.5247		0.747536
	39585			20794		0.5253		0.747247
25	38043	39787.5	2558.49	8001	8222	0.210315	568.543	0.898805	0.206648	0.896667
	41532			9002		0.216749		0.89571
	35279			7663		0.217211		0.895487
100	39085	38560	4381.16	2825	2367.33	0.0722784	398.359	0.965223	0.0613935	0.970479
	43644			2423		0.0555174		0.973287
	32951			1854		0.0562654		0.972927
0.01MCD标曲	C值	均值	标准差	T值	均值		标准差		T/C	抑制率	CAP	C			T
空白		30145	2380.37		69190.7	#DIV/0!	2517.13		2.29526			47439	49100.7	2110.03	83101	101628	1.75174	14555		2.06978
						#DIV/0!						52078			118659		2.27849
						#DIV/0!						47785			103123		2.15806
						#DIV/0!					10ppb	49977	45493.3	8352.06	84458	76031	1.68994	14118.1	0.183519	1.67126	0.192947
						#DIV/0!						52715			87493		1.65974		0.19811
						#DIV/0!						33788			56142		1.6616		0.197212
						#DIV/0!															0.0706
						#DIV/0!						0.32474	0.64948	0.064948
						#DIV/0!						0.36948	0.73896	0.073896			0.00498705	0.070638
	31048			70258		2.26288						0.36619	0.73238	0.073238
	26885			65716		2.44434
	32502			71598		2.20288
0.05	28864	31482.7	2158.69	74828	71191	2.59243	2783.1	-0.129472	2.26128	0.0539978
	34151			73876		2.16322		0.0575296
	31433			68506		2.17943		0.0504659			SD	CV		SD*100				因油水比为1：2，故计算的萃取率应2倍
0.1	37969	36173	3211.11	77889	77519	2.05138	7051.61	0.106253	2.14301	0.100461	0.00353183	0.065407		0.353183			mol/l	Capsaicin transfer efficiency（%）	SD
	34377			77149		2.2442		0.0222449			0.00579214	0.0576558		0.579214			0.01	0.0706	0.004987
	30113			62574		2.07797		0.0946684			0.0158397	0.0700486		1.58397			0.02	0.2526	0.00907
0.4	25609	32646	5002.89	71345	66591	2.78593	3365.01	-0.213776	2.03979	0.226124	0.0126004	0.0327581		1.26004			0.03	0.219	0.0188
	35529			64400		1.8126		0.210285			0.0270561	0.0484456		2.70561			0.04	0.1372	0.02019
	36800			64028		1.73989		0.241964			0.0253253	0.035948		2.53253
1.6	28464	28850.5	1220.26	39327	40958	1.38164	1907.48	0.398047	1.41966	0.384651	0.012165	0.0140019		1.2165
	29237			42589		1.45668		0.365353			0.000444473	0.000445384		0.0444473
	31351			43855		1.39884		0.390554
3.1	31980	31980	2203.24	32427	30909	1.01398	1083.74	0.55823	0.96651	0.558485							mol/l	I%	SD
	27514			29967		1.08915		0.525477									0.01	0.19295	0.00667678
	32371			30333		0.937042		0.591749									0.02	0.41454	0.0064817
6.2	32206	33127	1069.81	25603	23705.7	0.794976	1342.7	0.653645	0.7156	0.704498							0.03	0.40437	0.0130448
	34627			22691		0.655298		0.7145									0.04	0.3856	0.0162603
	32548			22823		0.701211		0.694496
25	31675	32285	972.139	8808	9566.33	0.278074	1154.72	0.878849	0.296309	0.868806
	32895			11198		0.340416		0.851687
	30514			8693		0.284886		0.875881
100	29901	29142.7	548.017	163	137	0.00545132	30.6268	0.997625	0.00470101	0.997955
	28902			94		0.00325237		0.998583
	28625			154		0.00537991		0.997656
0.02MCD标曲	C值	均值	标准差	T值	均值		标准差		T/C	抑制率	CAP	C			T
空白		56362.7	1305.32		136290	#DIV/0!	2346.45		2.41808			33371	30267	4797.69	70365	73603.3	2.10857	5700.41		2.4318
						#DIV/0!						23490			68829		2.93014
						#DIV/0!						33940			81616		2.40471
						#DIV/0!					10ppb	33120	32261.3	1286.42	47157	45913.7	1.42382	1418.26	0.414499	1.42318	0.414536
						#DIV/0!						33221			46655		1.40438		0.422493
						#DIV/0!						30443			43929		1.44299		0.406616
						#DIV/0!															0.2526
						#DIV/0!						1.25974	2.51948	0.251948
						#DIV/0!						1.3085	2.617	0.2617			0.00907659	0.0359327
	58196			136526		2.34597						1.21782	2.43564	0.243564
	55259			139038		2.51612
	55633			133305		2.39615
0.05	65126	63918.3	1327.31	146031	152251	2.24228	3217.69	0.0727021	2.38196	0.0278128
	62070			150628		2.42674		-0.00358132
	64559			153874		2.38346		0.0143175			SD	CV		SD*100
0.1	65977	64002	2847.7	145684	147926	2.2081	1964.06	0.0868379	2.31128	0.0954803	0.0089494	0.321773		0.89494
	62027			150169		2.42103		-0.00121677			0.00864241	0.0905152		0.864241
	68981			149434		2.16631		0.104123			0.0216197	0.0874286		2.16197
0.4	64465	59731.7	4058.33	114875	108526	1.78197	4783.71	0.263063	1.8169	0.247284	0.00780194	0.0165773		0.780194
	54554			103328		1.89405		0.216715			0.0140314	0.0224192		1.40314
	60176			107376		1.78437		0.262075			0.0170001	0.0216591		1.70001
1.6	56986	54830.5	2963.36	71983	69455	1.26317	4625.49	0.477615	1.26672	0.470641	0.0143128	0.0155628		1.43128
	52675			66927		1.27056		0.474557			0.00760274	0.00799211		0.760274
	59888			78236		1.30637		0.459749
3.1	50249	50249	1907.24	46899	47182.3	0.933332	353.702	0.61402	0.938971	0.625865
	54802			46967		0.857031		0.645574			IC50=1.84264ppb
	51619			47681		0.92371		0.617999
6.2	47766	50428.7	1957.72	27192	26153	0.569275	1139.94	0.764576	0.518614	0.784894
	51103			26701		0.522494		0.783922
	52417			24566		0.468665		0.806183
25	54228	57274.5	2718.5	9730	10918	0.179428	1683.62	0.925798	0.190626	0.919678
	60321			9725		0.161221		0.933327
	54948			13299		0.242029		0.899909
100	50074	52696	4195.16	4618	6229.33	0.0922235	1182.17	0.961861	0.118213	0.95128
	58616			7421		0.126604		0.947643
	49398			6649		0.134601		0.944336
0.03MCD标曲	C值	均值	标准差	T值	均值		标准差		T/C	抑制率	CAP	C			T
空白		27266.3	727.366		70805	#DIV/0!	1500.56		2.59679			22449	24413.7	1982.97	49079	51708.7	2.18624	5182.41		2.11802
						#DIV/0!						23663			47099		1.99041
						#DIV/0!						27129			58948		2.17288
						#DIV/0!					10ppb	22058	22935.7	882.54	28575	28928.3	1.29545	1130.23	0.388369	1.26128	0.404371
						#DIV/0!						22606			27755		1.22777		0.420322
						#DIV/0!						24143			30455		1.26144		0.404424
						#DIV/0!															0.219
						#DIV/0!										0.200398
						#DIV/0!										0.238022	0.0188157	0.0859164
	27238			70899		2.60294										0.218564
	26390			72594		2.75081
	28171			68922		2.44656
0.05	28072	30484.3	1723.33	71132	77953	2.53391	3359.75	0.0242142	2.55715	0.0430868
	31991			76760		2.39942		0.0760043
	31390			79146		2.52138		0.0290419			SD	CV		SD*100
0.1	26779	31467	3847.83	61227	70285	2.28638	8992.69	0.119536	2.23361	0.137223	0.0233594	0.542148		2.33594
	36155			79343		2.19452		0.15491			0.0176867	0.12889		1.76867
	32300			81137		2.51198		0.0326598			0.0315326	0.121932		3.15326
0.4	38220	37342.3	640.804	69371	71848.7	1.81504	2149.14	0.301044	1.92405	0.258608	0.0203357	0.0446056		2.03357
	36708			71563		1.94952		0.249258			0.010518	0.017844		1.0518
	37099			74612		2.01116		0.225522			0.00506705	0.00751628		0.506705
1.6	40796	38277	2138.85	60489	54471	1.48272	4931.92	0.429019	1.42307	0.455901	0.0256645	0.027337		2.56645
	35758			48453		1.35503		0.478193			0.00159165	0.00160799		0.159165
	39522			55370		1.40099		0.460491
3.1	31778	31778	2147.74	33751	37124.3	1.06209	2595.13	0.591	1.16824	0.589444
	36293			37559		1.03488		0.601476
	36374			40063		1.10142		0.575854
6.2	28081	27363	608.585	23544	23155.3	0.838432	667.493	0.677128	0.846228	0.674143
	27415			23706		0.864709		0.667009
	26593			22216		0.835408		0.678292
25	24139	23199	1137.87	3796	3854	0.157256	1751.87	0.939442	0.166128	0.938817
	22259			1738		0.0780808		0.969932
	24981			6028		0.241303		0.907076
100	26235	25997	187.41	844	686.667	0.0321708	112.565	0.987611	0.0264133	0.989839
	25979			629		0.0242119		0.990676
	25777			587		0.0227722		0.991231
0.04MCD标曲	C值	均值	标准差	T值	均值		标准差		T/C	抑制率	CAP	C			T
空白		31003.7	2737.23		84374	#DIV/0!	3620.83		2.72142			14912	12552	3121.6	59717	56547.7	4.00463	10930.8		4.50507
						#DIV/0!						14603			68066		4.6611
						#DIV/0!						8141			41860		5.14187
						#DIV/0!					10ppb	14385	13599.7	892.034	38387	37618	2.66854	2305.91	0.407658	2.7661	0.385603
						#DIV/0!						12352			34489		2.79218		0.380214
						#DIV/0!						14062			39978		2.84298		0.368938
						#DIV/0!															0.1372
						#DIV/0!
						#DIV/0!
	34874			89161		2.55666
	29132			80406		2.76006
	29005			83555		2.88071										0.16069
0.05	37179	33329	2831.38	88330	90092.5	2.3758	4788.31	0.126999	2.70313	0.00694433						0.13182	0.0201936	0.147184
	30451			84317		2.76894		-0.0174616								0.121796
	32357			95868		2.96282		-0.0887041			SD	CV		SD*100
0.1	35462	31900	2952.83	78863	72697.5	2.22387	5034.2	0.182826	2.27892	0.151343	0.0897353	12.9221		8.97353
	28338			66532		2.3478		0.137288			0.0223042	0.147374		2.23042
	30817			72635		2.35698		0.133916			0.0200662	0.0611662		2.00662
0.4	33254	32824	370.366	58916	60003	1.7717	1116.91	0.348981	1.82802	0.328059	0.0283041	0.0730835		2.83041
	32350			61539		1.90229		0.300995			0.0183134	0.0307813		1.83134
	32868			59554		1.81191		0.334203			0.0911157	0.129241		9.11157
1.6	33480	32647.5	1861.21	52208	53676.5	1.55938	2291.92	0.426998	1.64412	0.387285	0.0251904	0.0281031		2.51904
	31815			55145		1.7333		0.363089			0.00252505	0.00254433		0.252505
	28972			49533		1.70969		0.371767
3.1	32807	32807	1538.74	33871	35358	1.03243	1790.2	0.620627	1.07776	0.594953
	29973			34327		1.14526		0.579167
	33542			37876		1.12921		0.585065
6.2	30702	33073.7	2726.89	21444	26166.3	0.698456	7105.43	0.743349	0.791153	0.705006
	31626			36209		1.14491		0.579296
	36893			20846		0.565039		0.792373
25	26686	29140	3758.29	10110	7589.67	0.37885	2035.1	0.860789	0.260455	0.896357
	31594			7533		0.238431		0.912387
	22395			5126		0.22889		0.915893
100	25323	25375	79.2633	310	523.333	0.0122418	173.914	0.995502	0.020624	0.992421
	25487			524		0.0205595		0.992445
	25315			736		0.0290737		0.989317
PBST萃取标曲	C值	均值	标准差	T值	均值		标准差		T/C	抑制率	CAP	C			T
空白		11479	269.148		13216.3	#DIV/0!	619.766		1.15135			20300	18933	1050.09	23790	22595.3	1.17192	1170.89		1.19344
						#DIV/0!						17747			21005		1.18358
						#DIV/0!						18752			22991		1.22606
						#DIV/0!					10ppb	18509	19397	725.458	19907	20822.3	1.07553	819.187	0.0987951	1.07348	0.10056
						#DIV/0!						20286			21895		1.07932		0.0956236
						#DIV/0!						19396			20665		1.06543		0.107262
						#DIV/0!															0.0573
						#DIV/0!										0.05564
						#DIV/0!										0.052398	0.00587844	0.102591
	11490			12993		1.13081										0.063806
	11144			12594		1.13011
	11803			14062		1.19139
0.05	13156	12805.7	515.372	15978	13921.5	1.2145	1112.94	-0.0548522	1.08714	0.0428563
	12077			13252		1.09729		0.0469506
	13184			14591		1.10672		0.038762			SD	CV		SD*100
0.1	13941	14003.5	845.591	16069	15332.5	1.15264	1242.92	-0.00112428	1.0949	0.086217	0.00409428	0.0955352		0.409428
	14066			14596		1.03768		0.0987271			0.0125101	0.1451		1.25101
	12213			13025		1.06649		0.0737069			0.0125196	0.0925989		1.25196
0.4	13550	13585	193.871	13688	13525	1.01018	160.331	0.122608	0.995583	0.135202	0.0155132	0.0380534		1.55132
	13838			13580		0.981356		0.147647			0.0305827	0.0440982		3.05827
	13367			13307		0.995511		0.135352			0.00691773	0.00777391		0.691773
1.6	13975	13503	385.781	9725	9377	0.695886	362.936	0.395591	0.694438	0.40767	0.0192191	0.0199874		1.92191
	13031			9029		0.692886		0.398196			0.00258599	0.00262897		0.258599
	13540			8898		0.657164		0.429223
3.1	17559	17559	1400.17	6270	5542.33	0.357082	830.553	0.689858	0.315641	0.693512
	15180			5977		0.393742		0.658017
	14230			4380		0.3078		0.732661
6.2	16145	17505	2085.18	2074	2204	0.128461	128.517	0.888426	0.125907	0.889865
	15919			2159		0.135624		0.882204
	20451			2379		0.116327		0.898965
25	18746	18141.5	668.841	1088	798	0.058039	405.887	0.94959	0.0439875	0.96156
	17537			1082		0.0616981		0.946412
	17184			224		0.0130354		0.988678
100	19576	19390.3	1467.01	346	360.667	0.0176747	28.8714	0.984649	0.0186003	0.983652
	21087			335		0.0158866		0.986202
	17508			401		0.0229038		0.980107

## Sheet: optimization of extraction proc
CAP PH	C			T
5.93	31469	26393.3	5140.65	36491	29639.3	1.15959	6105.52		1.12299
	28363			30764		1.08465
	19348			21663		1.11965
5.93 10μg/kg	39655	38896.7	541.402	25417	25278	0.640953	675.491	0.429242	0.649876	0.421246
	38609			26027		0.674117		0.39971
	38426			24390		0.634726		0.434787
7.09	23923	21601.3	2292.91	30843	26809.7	1.28926	3065.91		1.24111	#DIV/0!
	22401			26171		1.1683
	18480			23415		1.26705
7.09 10μg/kg	28668	29380	503.461	20224	20580.7	0.705456	425.025	0.431594	0.700499	0.435539			pH	ER	SD	CV
	29735			21178		0.712225		0.42614					5.93	0.2678	0.0190183	0.0710167
	29737			20340		0.683996		0.448884					7.09	0.2528	0.0130443	0.0515992
8.71	19395	18043	3514.46	25644	23801	1.3222	4422.94		1.31913	#DIV/0!			8.71	0.521	0.0122018	0.0234201
	21509			28056		1.30438							9.77	0.4672	0.0372666	0.0797659
	13225			17703		1.3386						带入标曲计算得出浓度ng/ml
8.71 10μg/kg	26890	26720.7	2195.56	14096	14058	0.52421	949.149	0.602608	0.52611	0.600674		1.30416	1.32013	2.63054	2.13309
	23951			12877		0.537639		0.592428				1.15787	1.28836	2.51233	2.49155
	29321			15201		0.518434		0.606987				1.33626	1.41381	2.59763	2.40058
9.77	37325	27946.3	7654.66	55895	39444.7	1.49752	12379		1.41144	#DIV/0!
	27939			36406		1.30305						单个浓度对应萃取率ER
	18575			26033		1.40151						0.260832	0.264026	0.526108	0.426618
9.77 10μg/kg	20482	23461.3	2649.08	12942	14041	0.631872	1127.49	0.552322	0.598474	0.574347		0.231574	0.257672	0.502466	0.49831
	26918			15591		0.579204		0.589637				0.267252	0.282762	0.519526	0.480116
	22984			13590		0.591281		0.581081
															pH	I%	SD
															5.93	0.42125	0.0153958
计算CDpH与油水比的标曲															7.09	0.43554	0.0096954
CD pH CAP	C值	均值	标准差	T值	均值		标准差		T/C	抑制率					8.71	0.60067	0.00609908
空白		8221.33	1543.72		23258.3		2677.31		2.82902						9.77	0.57435	0.0159607
											IC50=1.85921ppb
	10404			27034		2.59842
	7170			21616		3.01478
	7090			21125		2.97955
0.05ppb	8751	8106	482.942	27165	23117.3	3.10422	3014.9	-0.0972755	2.85188	0.0427813
	7978			22254		2.78942		0.0139982
	7589			19933		2.62656		0.0715644			SD	CV		SD*100
0.1	7760	7779.67	111.506	29836	23518.7	3.84485	4491.72	-0.359072	3.02309	0.0762605
	7925			20936		2.64177		0.0661909			0.0100696	0.132042		1.00696
	7654			19784		2.58479		0.0863301			0.00511044	0.0285553		0.511044
0.4	9706	9470.33	476.317	22346	21994.3	2.30229	1065.95	0.18619	2.32245	0.178966	0.0155431	0.0322857		1.55431
	9899			23088		2.33236		0.175561			0.017229	0.0260503		1.7229
	8806			20549		2.33352		0.175149			0.00576509	0.00755698		0.576509
1.6	12634	12096.5	408.541	18101	17936.5	1.43272	83.9854	0.493563	1.48278	0.481422	0.00400808	0.00447146		0.400808
	11704			17897		1.52914		0.459483			0.00506753	0.0053061		0.506753
	12489			17976		1.43935		0.491221
3.1	14634	14096.5	408.541	13101	13936.5	0.895244	395.177	0.68355	0.98865	0.661376
	13704			13897		1.01408		0.641543
	14489			13976		0.964594		0.659036
6.2	14591	15369	656.908	9750	10461.5	0.66822	660.907	0.763798	0.680688	0.762882
	16147			11173		0.691955		0.755408
	15014			9793		0.652258		0.769441
25	16603	18921.3	1677.6	5046	5537.67	0.303921	441.103	0.89257	0.292668	0.896371
	20517			6116		0.298094		0.89463
	19644			5451		0.277489		0.901913
100	18401	18408.3	1234.55	2224	2324.67	0.120863	114.602	0.957277	0.126283	0.955039
	16900			2485		0.147041		0.948024
	19924			2265		0.113682		0.959816
油水比 10μg/kg	C值	均值	标准差	T值	均值		标准差		T/C	抑制率
空白		2716	287		46540		6799		17.1355
																	ng/ml
																	Cw	Cw'
																1	3.5224	2.70939
																2	2.6048	2.59763
																3	2.0665	2.03253
																4	1.71262	1.66517
	2408			42112		17.4884										5	1.4622	1.39126
	2429			39741		16.3611
	3003			53339		17.7619						1	2	3	4	5
1:1	6057	6140.5	83.5	40871	41325.5	6.74773	454.5	0.606213	6.72999	0.605579		2.66397	2.55454	2.01628	1.75351	1.4195
	6224			41780		6.71272		0.608256				2.68656	2.46077	1.95272	1.63238	1.40814
	6233			42480		6.81534		0.602268				2.61951	2.68656	2.05716	1.6986	1.3471
1:2	5877	5938.33	61.8457	40700	41006.7	6.9253	636.565	0.59585	6.90542	0.59694
	5915			41893		7.0825		0.586676					SD	CV
	6023			40427		6.7121		0.608292					0.0341143	0.0125911
1:3	5557	5604	40.5709	44005	44455.7	7.91884	456.308	0.537869	7.93285	0.537033			0.113434	0.0436681
	5599			45081		8.05162		0.530121					0.0526288	0.0258933
	5656			44281		7.82903		0.54311					0.0606529	0.0364245
1:4	5520	5433.33	63.421	47029	47095.7	8.51975	224.639	0.502801	8.66791	0.494073			0.0389373	0.0279871
	5370			47398		8.82644		0.484903
	5410			46860		8.66174		0.494515
1:5	5352	5256	12	50404	50246.5	9.41779	614.5	0.450393	9.55984	0.444875
	5244			49632		9.46453		0.447665			带入标曲得出μg/kg		带入萃取率公式得出EE%		SD	CV	1	2	3	4	5
	5268			50861		9.65471		0.436567			2.70939	1	0.270939		0.00278542	0.0102806	0.266397	0.510908	0.604884	0.701404	0.70975
											2.59763	2	0.519526		0.0185236	0.0356549	0.268656	0.492154	0.585816	0.652952	0.70407
											2.03253	3	0.609159		0.0128914	0.0211626	0.261951	0.537312	0.617148	0.67944	0.67355
											1.66517	4	0.666068		0.0198092	0.0297405
											1.39126	5	0.69563		0.0158961	0.0228514
震荡时间 10μg/kg	C值	均值	标准差	T值	均值		标准差		T/C	抑制率
空白		2994.33	87		50663.3		1565.5		16.9197
											CV			BZC
												30	0.53	0.00785413
												60	0.61	0.0151268
	3065			49415		16.1223						90	0.6	0.00608514
	3046			52853		17.3516						120	0.6	0.0187702
	2872			49722		17.3127						150	0.59	0.0122377
0.5min	4590	4753.5	49.5	36190	38508.5	7.88453	190.5	0.534004	8.10108	0.525453
	4803			38699		8.05726		0.523795
	4704			38318		8.14583		0.51856
1min	6030	5940.67	81.463	38201	39333.7	6.33516	1019.21	0.625576	6.62109	0.608573	0.534	0.626	0.595	0.6	0.609
	5959			40672		6.82531		0.596607			0.524	0.597	0.607	0.611	0.586
	5833			39128		6.70804		0.603538			0.519	0.604	0.604	0.575	0.59
1.5min	5890	5948.67	43.492	40345	40062.7	6.84975	298.932	0.595162	6.73473	0.60193
	5962			39649		6.65029		0.606951			30-60有显著性差异，60-150无显著性差异
	5994			40194		6.70571		0.603676
2min	5927	5811	183.472	40076	39805.7	6.7616	2590.86	0.600372	6.85005	0.595518
	5552			36506		6.57529		0.611384
	5954			42835		7.19432		0.574797
2.5min	6212	6002	38	41109	41851	6.61768	97	0.608878	6.97284	0.594877
	5964			41754		7.00101		0.586223
	6040			41948		6.94503		0.589531			带入标曲得出μg/kg		带入萃取率公式得出EE%		SD	CV
						30	60	90	120	150	1.95272	30	0.390544		0.00961012	0.024607
						1.98423	2.90127	2.54391	2.59763	2.69794	2.70939	60	0.541878		0.0287654	0.0530847
						1.90648	2.56523	2.67523	2.72089	2.45061	2.61951	90	0.523902		0.0111399	0.0212633
						1.86883	2.64162	2.64162	2.34215	2.49155	2.55454	120	0.510908		0.0315459	0.0617447
											2.49155	150	0.49831		0.0216482	0.0434432
						30	60	90	120	150
						0.396846	0.580254	0.508782	0.519526	0.539588
						0.381296	0.513046	0.535046	0.544178	0.490122
						0.373766	0.528324	0.528324	0.46843	0.49831
	方差分析：单因素方差分析
	SUMMARY
	组	观测数	求和	平均	方差
	列 1	3	8.10812	2.70271	0.0310294
	列 2	3	7.86076	2.62025	0.00465364
	方差分析		60&90s无显著性差异
	差异源	SS	df	MS	F	P-value	F crit
	组间	0.0101978	1	0.0101978	0.571578	0.491714	7.70865
	组内	0.0713661	4	0.0178415
	总计	0.0815639	5
	方差分析：单因素方差分析
	SUMMARY
	组	观测数	求和	平均	方差
	列 1	3	5.75954	1.91985	0.00346329
	列 2	3	8.10812	2.70271	0.0310294
	方差分析		30&60s有显著性差异
	差异源	SS	df	MS	F	P-value	F crit
	组间	0.919305	1	0.919305	53.3043	0.00187143	7.70865
	组内	0.0689854	4	0.0172463
	总计	0.98829	5
	方差分析：单因素方差分析
	SUMMARY
	组	观测数	求和	平均	方差
	列 1	3	7.86076	2.62025	0.00465364
	列 2	3	7.66067	2.55356	0.0373178
	方差分析		90&120无
	差异源	SS	df	MS	F	P-value	F crit
	组间	0.00667267	1	0.00667267	0.317962	0.602949	7.70865
	组内	0.083943	4	0.0209857
	总计	0.0906156	5
	方差分析：单因素方差分析
	SUMMARY
	组	观测数	求和	平均	方差
	列 1	3	1.53213	0.510711	0.00149271
	列 2	3	1.52802	0.50934	0.000702967
	方差分析		120&150无
	差异源	SS	df	MS	F	P-value	F crit
	组间	2.82083e-06	1	2.82083e-06	0.00256944	0.962003	7.70865
	组内	0.00439136	4	0.00109784
	总计	0.00439418	5

## Sheet: standard curve for CD
PBST CAP	C值	均值	标准差	T值	均值		标准差			T/C	抑制率
空白		10051	784.028		34673.7		2268.69			3.44977
	9330			33373
	9682			32784
	11141			37864
0.1ng/ml	9110	9592	401.102	28816	30508.3	3.16312	1267.45	0.916906	0.083094	3.1806	0.0780257
	10092			31866		3.15755		0.915292	0.0847077
	9574			30843		3.22154		0.93384	0.0661595
0.4ng/ml	9865	10194.3	630.803	29652	30470.7	3.00578	580.102	0.871297	0.128703	2.98898	0.133572
	9641			30926		3.20776		0.929846	0.0701537
	11077			30834		2.78361		0.806895	0.193105			IC50	1.56882	ppb
1.6ng/ml	15422	13553.7	1346.62	28378	26618	1.8401	1309.5	0.533397	0.466603	1.9639	0.430717
	12939			26237		2.02775		0.587791	0.412209			0.00838924	0.922013	0.00909883
	12300			25239		2.05195		0.594808	0.405192			0.0502135	0.869346	0.05776
3.2ng/ml	17397	16683.3	938.765	15322	15867.7	0.880727	2227.19	0.2553	0.7447	0.951109	0.724298	0.0274453	0.571999	0.0479814
	17296			18827		1.08852		0.315533	0.684467			0.0287168	0.274929	0.104452
	15357			13454		0.876083		0.253954	0.746046			0.00441008	0.0912824	0.0483125
6.4ng/ml	19650	17806	1969.62	6373	5595.67	0.324326	594.682	0.0940136	0.905986	0.314257	0.908905	0.00125109	0.0342564	0.0365213
	15076			4929		0.326943		0.0947725	0.905228			0.00152807	0.0137487	0.111143
	18692			5485		0.293441		0.085061	0.914939			SD	B/B0	CV
25ng/ml	18399	17674.7	1502.91	2066	2085	0.112289	152.055	0.0325496	0.96745	0.117965	0.965805
	19043			2280		0.119729		0.0347064	0.965294
	15582			1909		0.122513		0.0355134	0.964487
100ng/ml	16068	16952.3	3813.62	890	784.333	0.0553896	115.892	0.016056	0.983944	0.046267	0.986588
	22002			840		0.0381783		0.0110669	0.988933
	12787			623		0.0487214		0.0141231	0.985877

## Sheet: standard curve for oil sample
CAP油样	C值	均值	标准差	T值	均值		标准差			T/C	抑制率	ng/ml➗0.9=μg/kg		ng/ml换算成μg/kg是经过多次测量花生油大豆油玉米油菜籽油等1ml时的质量进行换算的
空白	5863	6658.82	1144.56	15922	18693.5	2.71567	3278.85			2.80732
	7167			20213		2.82029
	7817			23453		3.00026									LOD=	0.13682
	7756			20977		2.70462									IC50=	5.0205
	7084			19256		2.71824
	4590			12631		2.75185
	8122			22248		2.73923
	6901			20800		3.01406
	5435			15861		2.91831
	5140			14548		2.83035
	7372			19719		2.67485														0.1ug/kg	C值	均值	标准差	T值	均值		标准差			T/C	抑制率
	8179			16114		1.97017		B/B0	抑制率											空白		9574.67	808.5		26293.7	#DIV/0!	3191.5			2.74617
0.04μg/kg	7996	7189.67	1130	21056	18757.3	2.63332	3130	0.938017	0.0619831	2.60893	0.0706701															#DIV/0!
	5736			14796		2.5795		0.918846	0.0811539																	#DIV/0!
	7837			20420		2.60559		0.92814	0.07186																	#DIV/0!
0.33μg/kg	7360	7531.33	404.759	18290	18380.3	2.48505	948.88	0.885204	0.114796	2.44052	0.130661															#DIV/0!
	7144			17266		2.41685		0.86091	0.13909																	#DIV/0!
	8090			19585		2.42089		0.862348	0.137652																	#DIV/0!
1μg/kg	9896	8949.67	1534.5	20605	18989.7	2.08215	2455	0.741687	0.258313	2.12183	0.244181															#DIV/0!
	6942			15727		2.26549		0.806991	0.193009																	#DIV/0!
	10011			20637		2.06143		0.734305	0.265695			SD	i%	CV							9696			28182		2.90656
3μg/kg	11633	11744	511.873	19930	19645.7	1.71323	526.907	0.610272	0.389728	1.67283	0.404121	0.00782767	0.0716657	0.109225							8079			21799		2.69823
	12419			20100		1.61849		0.576524	0.423476			0.0111289	0.130512	0.0852705				代入标曲得出ug/kg			10949			28900		2.63951		B/B0	抑制率
	11180			18907		1.69114		0.602405	0.397595			0.032664	0.239006	0.136666				0.4021			8739	8533	206	20388	20520	2.33299	132	0.849543	0.150457	2.40478	0.124315
9μg/kg	12728	12163.7	385	14118	13257.3	1.10921	758.5	0.395112	0.604888	1.08991	0.611761	0.014417	0.4036	0.0357211		S0		0.1443			8327			20652		2.48012		0.903121	0.0968787
	11958			12601		1.05377		0.375365	0.624635			0.00903012	0.611884	0.0147579		0.144219		0.22519			8399			20395		2.42827		0.884237	0.115763
	11805			13053		1.10572		0.393869	0.606131			0.0235668	0.789032	0.0298681		S0'		0.51194			7752	8572.67	794.152	17689	20901.3	2.28186	2541.59	0.830925	0.169075	2.43814	0.112168
27μg/kg	13181	14639.7	1731.28	8704	8557.67	0.660344	130.057	0.235222	0.764778	0.584553	0.791776	0.00149222	0.915323	0.00163026		0.0456059		0.06843			8319			21111		2.53768		0.924081	0.0759187
	13666			8388		0.613786		0.218637	0.781363						LOD=	3S0'		0.14758			9647			23904		2.47787		0.9023	0.0977003
	17072			8581		0.502636		0.179045	0.820955							0.136818		0.15909			9407	9423	367	23236	22516	2.47008	333	0.899462	0.100538	2.38947	0.129889
81μg/kg	19023	17438	1129.58	4633	4150	0.243547	344.526	0.0867543	0.913246	0.237986	0.915227				LOQ=	10S0'		0.40021			9790			22849		2.33391		0.849879	0.150121
	16818			3964		0.2357		0.0839589	0.916041							0.456059		0.19066			9056			22183		2.44954		0.891983	0.108017
	16473			3853		0.233898		0.0833171	0.916683									0.07787			7097	7097	0	17954	17954	2.5298	0	0.921211	0.0787894	2.5298	0.0787894
																										#DIV/0!		#DIV/0!	#DIV/0!
																										#DIV/0!		#DIV/0!	#DIV/0!
合成CAP油样 S-CAP	C值	均值	标准差	T值	均值		标准差			T/C	抑制率
空白	7337	6609.5	705.71	20509	19865	2.79528	1912.44			3.00552
	7825			22009		2.81265
	7361			20190		2.74283
	7158			20813		2.90766
	7137			20709		2.90164
	5640			17935		3.17996
	6328			19318		3.05278
	6037			17867		2.95958
	6769			18863		2.78667
	6835			21409		3.13226
	6972			22006		3.15634
	5403			15243		2.82121
0.11μg/kg	8296	8085.33	336.834	22868	22467.7	2.75651	786.343	0.917148	0.0828519	2.77882	0.0751584
	8350			23166		2.77437		0.923091	0.0769088
	7610			21369		2.80802		0.934285	0.0657146
0.33μg/kg	8564	8517.5	46.5	22281	21876	2.6017	405	0.865641	0.134359	2.56836	0.145436
	8471			21471		2.53465		0.84333	0.15667
	8406			21594		2.56888		0.85472	0.14528
1μg/kg	9064	8552	512	21332	20405	2.35349	927	0.783054	0.216946	2.38599	0.198394
	8040			19478		2.42264		0.806062	0.193938
	8587			21052		2.45161		0.815703	0.184297
3μg/kg	9328	9322	6.79869	17156	17132	1.83919	61.6513	0.611938	0.388062	1.8378	0.390217
	9332			17008		1.82255		0.606399	0.393601			IC50=	5.54266ug/kg
	9316			17108		1.83641		0.611012	0.388988
9μg/kg	10154	10792.5	678	11993	13558.5	1.18111	1105.5	0.39298	0.60702	1.25629	0.589993		bzc	I%	cv
	11510			14204		1.23406		0.410597	0.589403				0.00870171	0.0752	0.115714
	10075			12913		1.28169		0.426444	0.573556				0.0111565	0.1454	0.0767296
27μg/kg	15025	15351.7	234.289	10069	10013.3	0.67015	39.3813	0.222973	0.777027	0.652264	0.782914		0.0167742	0.1984	0.0845475
	15563			9987		0.641714		0.213512	0.786488				0.00296699	0.3902	0.00760377
	15467			9984		0.645503		0.214772	0.785228				0.0167397	0.59	0.0283724
81μg/kg	17871	18567.7	1430.63	5462	5479.33	0.305635	23.8094	0.101691	0.898309	0.295101	0.901285		0.00513724	0.7829	0.0065618
	20561			5513		0.268129		0.0892121	0.910788				0.00841958	0.9013	0.00934159
	17271			5463		0.316311		0.105243	0.894757
二氢CAP油样 D-CAP	C值	均值	标准差	T值	均值		标准差	bzc	单个I%	T/C	抑制率
空白	8303	7478.11	1108.76	21693	19896.1		2642			2.66058
	7851			20056
	7466			19495
	8200			22969
	8518			21982
	7454			20684
	5120			15320
	5987			15289
	8404			21577
	9123			20776
	9162			21480
	8835			21492
0.11μg/kg	8361	8385.5	24.5	20531	20733	2.45557	202	0.922945	0.0770555	2.47248	0.0683267
	8410			20935		2.4893		0.935623	0.0643774
	8360			20829		2.49151		0.936453	0.0635473
0.33μg/kg	9683	9430	253	22940	22490	2.3691	450	0.890445	0.109555	2.38494	0.108296
	9177			22040		2.40166		0.902682	0.0973184
	8497			19939		2.34659		0.881986	0.118014
1μg/kg	9098	8943.67	130.436	19777	19331	2.17377	322.741	0.81703	0.18297	2.16142	0.187578
	8779			19192		2.18613		0.821673	0.178327
	8954			19024		2.12464		0.798562	0.201438
3μg/kg	11667	11716	27	18443	18142.7	1.58078	617.5	0.59415	0.40585	1.54854	0.402862
	11721			17208		1.46813		0.55181	0.44819
	11760			18777		1.59668		0.600126	0.399874
9μg/kg	11918	13855	1637.66	13600	14668	1.14113	1175.95	0.428903	0.571097	1.05868	0.600033		bzc	I%	cv
	13724			14098		1.02725		0.386101	0.613899				0.00757071	0.0683	0.110845
	15923			16306		1.02405		0.384899	0.615101				0.0104053	0.1083	0.0960783
27μg/kg	16961	18352.3	990.16	8231	8875	0.48529	473.971	0.1824	0.8176	0.48359	0.818194		0.0122254	0.1876	0.0651676
	19185			9036		0.470993		0.177026	0.822974				0.0263403	0.4029	0.0653768
	18911			9358		0.494844		0.185991	0.814009				0.0250663	0.6	0.0417771
81μg/kg	21301	20458.3	1632.91	4017	3933.67	0.188583	163.661	0.0708803	0.92912	0.192277	0.927497		0.00451179	0.8182	0.00551429
	21899			4079		0.186264		0.0700089	0.929991				0.00359143	0.9275	0.00387216
	18175			3705		0.203851		0.0766192	0.923381

## Sheet: recovery
回收率 大豆油	C值	均值	标准差	T值	均值		标准差	I	T/C	抑制率			ng/ml➗0.9=μg/kg
空白	7491	7299	192	22024	21067.5	2.94006	956.5		2.88635
	7107			20111		2.82975
	7881			21201		2.69014					CR%	CV%	带入标曲回收ug/kg	加样ug/kg	I%	标准差	ug/kg0.55	1.11	5.55
						#DIV/0!					1.15793	0.107946	0.63686	0.55	0.184	0.0687462	0.58204	1.21406	5.61679
						#DIV/0!					1.13722	0.116089	1.26231	1.11	0.2605	0.14654	0.64918	1.12246	5.30481
						#DIV/0!					1.01046	0.0572017	5.60805	5.55	0.5167	0.32079	0.71952	1.40936	5.94631
						#DIV/0!
						#DIV/0!
						#DIV/0!
						#DIV/0!
						#DIV/0!
						#DIV/0!
0.55μg/kg	8464	8617	108.361	20161	20293.7	2.38197	168.209	0.174748	2.35507	0.183988
	8701			20531		2.35961		0.182493
	8686			20189		2.32431		0.194723
1.11μg/kg	9331	9431.33	88.3566	19991	20132	2.14243	310.774	0.257739	2.13459	0.260478
	9417			19842		2.10704		0.269999
	9546			20563		2.1541		0.253697
5.55μg/kg	11828	12173.5	345.5	16498	17179.5	1.39483	681.5	0.516752	1.41122	0.516711
	12519			17861		1.42671		0.505705
	13430			18309		1.36329		0.527677
回收率 玉米油	C值	均值	标准差	T值	均值		标准差		T/C	抑制率
空白	7111	7830	510.573	20358	21358.3	2.86289	846.047		2.72776
	8132			22427		2.75787
	8247			21290		2.58154
						#DIV/0!					CR%	CV%	ug/kg	加样ug/kg	I%	标准差	ug/kg0.55	1.11	5.55
						#DIV/0!					0.924927	0.100487	0.50871	0.55	0.1647	0.0511185	0.54965	1.30965	4.87992
						#DIV/0!					1.11068	0.133741	1.23286	1.11	0.2572	0.164885	0.5243	1.35898	5.4163
						#DIV/0!					0.948883	0.0794927	5.2663	5.55	0.5043	0.418632	0.4512	1.05194	5.70487
						#DIV/0!
						#DIV/0!
						#DIV/0!
						#DIV/0!
						#DIV/0!
0.55μg/kg	9219	9432	213	20825	21315.5	2.25892	490.5	0.171876	2.25991	0.164653
	9645			21806		2.26086		0.171165
	9181			21264		2.31609		0.150919
1.11μg/kg	10027	10280	253	20274	20607	2.02194	333	0.258753	2.00457	0.257166
	10533			20940		1.98804		0.271182
	10387			21489		2.06884		0.241561
5.55μg/kg	12255	13233.5	978.5	17003	17874	1.38743	871	0.491365	1.35066	0.504297
	14212			18745		1.31896		0.516469
	12957			17493		1.35008		0.505058
回收率 花生油	C值	均值	标准差	T值	均值		标准差		T/C	抑制率
空白	8960	8602.33	597.98	22895	22124.7	2.55525	1036.57		2.57194
	8268			20778		2.51306
	8579			22701		2.64611					CR%	CV%	ug/kg	加样ug/kg	I%	标准差	ug/kg0.55	1.11	5.55
						#DIV/0!					1.00987	0.133456	0.55543	0.55	0.1719	0.0741256	0.64232	1.33912	4.58201
						#DIV/0!					1.1175	0.0984003	1.24042	1.11	0.2581	0.122058	0.5243	1.1046	4.82908
						#DIV/0!					0.887586	0.083849	4.9261	5.55	0.4912	0.413049	0.50561	1.28055	5.38822
						#DIV/0!
						#DIV/0!
						#DIV/0!
						#DIV/0!
						#DIV/0!
						#DIV/0!
0.55μg/kg	9862	9431	431	20683	20027.5	2.09724	655.5	0.184567	2.12358	0.171851
	9000			19372		2.15244		0.163104
	9268			19835		2.14016		0.16788
1.11μg/kg	10759	10059.5	208.5	20514	19196	1.90668	160	0.258659	1.90825	0.258127
	9851			19036		1.93239		0.248663
	10268			19356		1.88508		0.267059
5.55μg/kg	12131	12468.7	403.581	16286	16304.3	1.34251	131.687	0.478016	1.30762	0.49117
	13036			16474		1.26373		0.508646
	12239			16153		1.3198		0.486847
回收率 菜籽油	C值	均值	标准差	T值	均值		标准差		T/C	抑制率
空白	8094	8465.33	264.698	20842	22804.3	2.57499	1432.01		2.69385
	8610			23352		2.7122
	8692			24219		2.78636					CR%	CV%	ug/kg	加样ug/kg	I%	标准差	ug/kg0.55	1.11	5.55
						#DIV/0!					0.941891	0.109731	0.51804	0.55	0.1661	0.0568448	0.56899	1.20473	5.47288
						#DIV/0!					1.03561	0.074513	1.14953	1.11	0.2483	0.085655	0.5306	1.19543	5.646
						#DIV/0!					1.01519	0.018008	5.6343	5.55	0.5176	0.101463	0.45712	1.05194	5.82438
						#DIV/0!
						#DIV/0!
						#DIV/0!
						#DIV/0!
						#DIV/0!
						#DIV/0!
0.55μg/kg	9621	8832	789	21592	19770	2.24426	1822	0.166896	2.23845	0.166138
	8043			17948		2.23151		0.171629
	9387			21244		2.26313		0.15989
1.11μg/kg	9978	10015.5	37.5	19917	20189.5	1.99609	272.5	0.259019	2.01583	0.248349
	10053			20462		2.03541		0.244422
	9674			19764		2.043		0.241605
5.55μg/kg	11617	12228.5	429.5	15097	15884.5	1.29956	361.5	0.517582	1.29897	0.517588
	12658			16246		1.28346		0.52356
	11799			15523		1.31562		0.511621

## Sheet: selectivity
干扰物质添加检测	C值	均值	标准差	T值	均值		标准差			T/C	抑制率
空白	14083	14463.9	1278.8	53492	48552.2	3.79834	3788.3			3.35678
	15195			51979		3.4208
	14459			50201		3.47196
	14637			48403		3.30689
	11821			44509		3.76525
	14056			47157		3.35494
	12005			40927		3.40916
	11983			47055		3.92681
	17153			46665		2.72052									I%	SD	CV
	15709			50016		3.18391							CAP		0.238	0.0125132	0.0525767
	15192			47925		3.15462							CAP+TBHQ		0.236	0.0230731	0.0977675
	17274			54298		3.14334							CAP+EM		0.242	0.0117772	0.048666
CAP1ug/kg	18850	18844	170.701	47976	48183.7	2.54515	238.711	0.75821	0.24179	2.55698	0.238176		CAP+VE		0.235	0.0140818	0.0599226
	18632			48518		2.60401		0.775747	0.224253				CAP+AFB1		0.228	0.0106318	0.0466307
	19050			48057		2.52268		0.751516	0.248484				CAP+ZEN		0.244	0.0202102	0.0828286
CAP1ug/kg+TBHQ	17462	18532.7	952.544	46035	47491.7	2.6363	1256.8	0.785364	0.214636	2.56259	0.235625
	19776			49102		2.48291		0.739669	0.260331
	18360			47338		2.57832		0.768093	0.231907
CAP1ug/kg+Ethyl Maltol	19501	18756	511.5	48803	47682.3	2.50259	985	0.745532	0.254468	2.54224	0.242317
	18895			48107		2.54602		0.758469	0.241531
	17872			46137		2.58152		0.769047	0.230953
CAP1ug/kg+Vitamin E	18910	18356.3	407	48525	47127	2.5661	1454.5	0.764453	0.235547	2.56734	0.235164
	18096			45616		2.52078		0.75095	0.24905
	18063			47240		2.61529		0.779106	0.220894
CAP1ug/kg+AFB1	18313	18057	152.5	46735	46810.3	2.55201	213.5	0.760255	0.239745	2.59236	0.227643
	18008			47162		2.61895		0.780195	0.219805
	17850			46534		2.60695		0.77662	0.22338
CAP1ug/kg+ZEN	19113	18990.3	352.5	47835	48177	2.50275	163.5	0.745579	0.254421	2.53692	0.243877
	18408			48162		2.61636		0.779425	0.220575
	19450			48534		2.49532		0.743367	0.256633

## Sheet: CRM and stroage
5.17 CRM	C			T				I%
空白	25124	24238	672.68	27862	27460.3	1.10898	313.484		1.13295	0.0301032		I%	ug/kg
	23495			27422		1.16714
	24095			27097		1.12459
3.35ug/kg	39069	42379.3	2660.4	25466	27493.7	0.651821	1640.16	0.424667	0.648882	0.00261868	3.53	0.42	3.48927
	45583			29483		0.646798		0.4291			回收率	0.43	3.54565
	42486			27532		0.648025		0.428017			1.05373	0.43	3.56461
11.22日	C			T											b%=5.421%
空白	19061	22879	2729.46	26191	26712.7	1.37406	435.054		1.16756	0.167958		I%	ug/kg
	24296			27256		1.12183
	25280			26691		1.05581
3.35 ug/kg	30864	38113	6751.9	21063	24589.3	0.682446	3340.49	0.415496	0.645169	0.0327023	3.84	0.42	3.39689
	47120			29075		0.617042		0.471513			回收率	0.47	4.41835
	36355			23630		0.649979		0.443302			1.14627	0.44	3.7787
															b%=14.86%
					Control	CRM	SD-Control	SD-CRM
			0 Month	May 17	1.13	0.65	0.03	0
			6 Month	Nov 12	1.17	0.65	0.17	0.03
